# Supplementary material for: Hip Osteoarthritis and the Risk of Lacunar Stroke: A Two-Sample Mendelian Randomization Study
Source: MDPI journal article supplement (doi:10.3390/genes13091584), 2022-09-03
Supplement: s1 [file s1]

## Supplementary Materials

**Table S1** Selecting instrumental variables related to hip osteoarthritis by GWAS threshold ( $p$ -value  $< 5 \times 10^{-8}$ ) (27 SNPs)

| SNP         | Position  | Chr | EA | OA | EAF  | $\beta$ | SE   | $p$ -value             | $R^2$ | $F$     |
|-------------|-----------|-----|----|----|------|---------|------|------------------------|-------|---------|
| rs12040949  | 150447462 | 1   | T  | C  | 0.38 | -0.07   | 0.01 | $2.83 \times 10^{-8}$  | 0.002 | 825.99  |
| rs11583641  | 183906245 | 1   | T  | C  | 0.28 | -0.08   | 0.01 | $5.57 \times 10^{-10}$ | 0.003 | 1038.98 |
| rs4338381   | 103572927 | 1   | G  | A  | 0.37 | -0.10   | 0.01 | $4.37 \times 10^{-15}$ | 0.004 | 1660.63 |
| rs74767794  | 184006128 | 1   | G  | A  | 0.32 | -0.08   | 0.01 | $2.56 \times 10^{-9}$  | 0.002 | 964.45  |
| rs2785988   | 219744138 | 1   | A  | C  | 0.30 | 0.08    | 0.01 | $7.30 \times 10^{-11}$ | 0.003 | 1134.79 |
| rs7571789   | 70714793  | 2   | C  | T  | 0.52 | -0.09   | 0.01 | $3.26 \times 10^{-14}$ | 0.004 | 1548.47 |
| rs1835323   | 43512130  | 2   | T  | C  | 0.34 | -0.07   | 0.01 | $4.56 \times 10^{-8}$  | 0.002 | 805.45  |
| rs3774355   | 52817778  | 3   | A  | G  | 0.36 | 0.09    | 0.01 | $8.20 \times 10^{-14}$ | 0.004 | 1498.94 |
| rs798748    | 1716770   | 4   | C  | T  | 0.62 | 0.07    | 0.01 | $2.50 \times 10^{-9}$  | 0.002 | 952.72  |
| rs1913707   | 13039440  | 4   | G  | A  | 0.39 | -0.08   | 0.01 | $2.96 \times 10^{-11}$ | 0.003 | 1185.45 |
| rs12209223  | 76164589  | 6   | A  | C  | 0.10 | 0.16    | 0.02 | $3.88 \times 10^{-16}$ | 0.004 | 1777.66 |
| rs2396502   | 45357699  | 6   | C  | A  | 0.60 | 0.08    | 0.01 | $2.12 \times 10^{-12}$ | 0.003 | 1342.89 |
| rs115740542 | 26123502  | 6   | C  | T  | 0.07 | 0.13    | 0.02 | $1.60 \times 10^{-8}$  | 0.002 | 864.02  |
| rs80287694  | 55636940  | 6   | G  | A  | 0.11 | 0.11    | 0.02 | $2.66 \times 10^{-9}$  | 0.002 | 946.25  |
| rs60890741  | 130768503 | 8   | CA | C  | 0.14 | -0.11   | 0.02 | $4.50 \times 10^{-9}$  | 0.003 | 1098.10 |
| rs2929451   | 9085295   | 8   | T  | A  | 0.51 | -0.07   | 0.01 | $3.11 \times 10^{-9}$  | 0.002 | 942.12  |
| rs13300602  | 129412938 | 9   | G  | A  | 0.45 | 0.07    | 0.01 | $1.65 \times 10^{-9}$  | 0.003 | 1002.37 |
| rs34687269  | 119484132 | 9   | T  | A  | 0.47 | -0.08   | 0.01 | $1.67 \times 10^{-12}$ | 0.003 | 1342.84 |
| rs10896015  | 65323725  | 11  | A  | G  | 0.27 | -0.08   | 0.01 | $2.74 \times 10^{-9}$  | 0.002 | 950.66  |
| rs10492367  | 28014970  | 12  | T  | G  | 0.19 | 0.15    | 0.01 | $1.25 \times 10^{-24}$ | 0.007 | 2813.57 |
| rs79056043  | 59289598  | 12  | G  | A  | 0.05 | 0.16    | 0.03 | $1.33 \times 10^{-9}$  | 0.003 | 996.19  |
| rs11059094  | 122606837 | 12  | T  | C  | 0.48 | 0.08    | 0.01 | $7.38 \times 10^{-11}$ | 0.003 | 1135.52 |
| rs12901372  | 67370506  | 15  | G  | C  | 0.47 | -0.08   | 0.01 | $3.46 \times 10^{-11}$ | 0.003 | 1205.78 |

|            |          |    |   |   |      |      |      |                        |       |         |
|------------|----------|----|---|---|------|------|------|------------------------|-------|---------|
| rs62063281 | 44038785 | 17 | G | A | 0.22 | 0.10 | 0.01 | $5.30 \times 10^{-12}$ | 0.003 | 1272.11 |
| rs7222178  | 59652282 | 17 | A | T | 0.20 | 0.10 | 0.01 | $3.77 \times 10^{-11}$ | 0.003 | 1173.22 |
| rs4252548  | 55879672 | 19 | T | C | 0.02 | 0.28 | 0.04 | $1.96 \times 10^{-12}$ | 0.003 | 1319.01 |
| rs2836618  | 40048295 | 21 | A | G | 0.26 | 0.09 | 0.01 | $3.20 \times 10^{-11}$ | 0.003 | 1170.28 |

SNP, single nucleotide polymorphism; Chr, chromosome; EA, effect allele; OA, other allele, SE, standard error.

<sup>a</sup> $R^2$  were calculated using the following formula:  $2 \times \text{MAF} \times (1 - \text{MAF}) \times \text{Beta}^2$ , where MAF is the minor allele frequency, Beta is the estimated effect on hip osteoarthritis.

<sup>b</sup> $F$  were calculated using the following formula:  $R^2(N-2)/(1-R^2)$ , where  $R^2$  is the proportion of variance in hip osteoarthritis explained by each instrument and N is the sample size of the GWAS for the hip osteoarthritis association.

**Table S2** The secondary phenotypes of the instrumental variables used for hip osteoarthritis (from the GWAS catalog)<sup>a</sup>.

| SNP         | Chr | Position  | Trait <sup>a</sup>                                | <i>p</i> -value               |
|-------------|-----|-----------|---------------------------------------------------|-------------------------------|
| rs10896015  | 11  | 65556254  | Serum alkaline phosphatase levels                 | $1.00 \times 10^{-10}$        |
| rs115740542 | 6   | 26123274  | Serum levels of protein TF                        | $3.00 \times 10^{-26}$        |
|             |     |           | Free cholesterol levels in large LDL              | $2.00 \times 10^{-16}$        |
|             |     |           | Concentration of large LDL particles              | $6.00 \times 10^{-11}$        |
|             |     |           | Phospholipid levels in large LDL                  | $1.00 \times 10^{-13}$        |
|             |     |           | Estimated glomerular filtration rate (creatinine) | $3.00 \times 10^{-10}$        |
|             |     |           | Cholesterol levels in small LDL                   | $2.00 \times 10^{-14}$        |
|             |     |           | Phospholipid levels in LDL                        | $2.00 \times 10^{-14}$        |
|             |     |           | Ratio of linoleic acid to total fatty acids       | $6.00\text{E} \times 10^{-9}$ |
|             |     |           | Phospholipids to total lipids ratio in medium HDL | $2.00 \times 10^{-12}$        |
|             |     |           | Free cholesterol levels in LDL                    | $3.00 \times 10^{-17}$        |
|             |     |           | Free cholesterol levels in medium LDL             | $3.00 \times 10^{-17}$        |
|             |     |           | Phospholipid levels in small LDL                  | $3.00 \times 10^{-16}$        |
|             |     |           | Free cholesterol levels in small LDL              | $4.00 \times 10^{-19}$        |
|             |     |           | Total lipid levels in small LDL                   | $3.00 \times 10^{-14}$        |
|             |     |           | Serum levels of protein NAALAD2                   | $4.00 \times 10^{-24}$        |
|             |     |           | Total esterified cholesterol levels               | $5.00 \times 10^{-12}$        |
|             |     |           | Total cholesterol levels                          | $1.00 \times 10^{-11}$        |
|             |     |           | Clinical LDL cholesterol levels                   | $2.00 \times 10^{-14}$        |
|             |     |           | Total free cholesterol levels                     | $4.00 \times 10^{-10}$        |
|             |     |           | Sphingomyelin levels                              | $1.00 \times 10^{-12}$        |
|             |     |           | Hemoglobin concentration                          | $2.00 \times 10^{-580}$       |
|             |     |           | Waist circumference adjusted for body mass index  | $4.00\text{E} \times 10^{-8}$ |
|             |     |           | Skin and soft tissue infections                   | $4.00 \times 10^{-7}$         |
|             |     |           | Apolipoprotein B levels                           | $5.00 \times 10^{-10}$        |
| rs12209223  | 6   | 75454873  | Height                                            | $5.00 \times 10^{-25}$        |
|             |     |           | Hip circumference adjusted for BMI                | $3.00 \times 10^{-18}$        |
| rs4252548   | 19  | 55368304  | Appendicular lean mass                            | $5.00 \times 10^{-35}$        |
|             |     |           | Height                                            | $3.00 \times 10^{-68}$        |
|             |     |           | Lung function (FVC)                               | $5.00 \times 10^{-9}$         |
| rs4338381   | 1   | 103107371 | Height                                            | $2.00 \times 10^{-6}$         |
| rs62063281  | 17  | 45961419  | Number of sexual partners                         | $4.00 \times 10^{-15}$        |
| rs798748    | 4   | 1715043   | Mean reticulocyte volume                          | $4.00 \times 10^{-15}$        |

Chr, chromosome; SNP, single nucleotide polymorphism.

<sup>a</sup>Traits associated with the SNP according to previous genome-wide association studies.

**Table S3** Effect estimates of the associations between hip osteoarthritis and risk of lacunar stroke after excluding potential secondary phenotypes SNPs.

| Method          | SNPs (N) | OR   | 95%CI     | MR <i>p</i> -value | Heterogeneity <i>Q</i> / <i>p</i> -value | Pleiotropy Intercept <i>p</i> -value |
|-----------------|----------|------|-----------|--------------------|------------------------------------------|--------------------------------------|
| IVW             | 15       | 1.18 | 1.02~1.36 | 0.023              | 15.70/0.332                              |                                      |
| Weighted median | 15       | 1.22 | 1.01~1.49 | 0.04               |                                          |                                      |
| MR Egger        | 15       | 0.99 | 0.53-1.85 | 0.969              |                                          | 0.575 <sup>a</sup>                   |
| MR-PRESSO       | 15       | /    | /         | 0.101 <sup>b</sup> |                                          |                                      |

SNP, single nucleotide polymorphism; OR, odds ratio; CI, confidence interval; IVW, Inverse-variance-weighted; MR, Mendelian randomization; MR-PRESSO, MR Pleiotropy RESidual Sum and Outlier.

<sup>a</sup> The *p*-value of the intercept from MR Egger regression analysis.

<sup>b</sup> The *p*-value of MR-PRESSO global test.
